# Supplementary material for: No prescription? No problem: drivers of non-prescribed sale of antibiotics among community drug retail outlets in low and middle income countries: a systematic review of qualitative studies
Source: BMC Public Health. 2021 Jun 3;21:1056. doi: 10.1186/s12889-021-11163-3 (PMC8173982; doi:10.1186/s12889-021-11163-3)
Supplement: Supplementary file 2 — Additional file 2:. Quality assessment of the included studies [file 12889_2021_11163_MOESM2_ESM.docx]

**No prescription? No problem: Drivers of non-prescribed sale of antibiotics among community drug retail outlets in low and middle income countries: a systematic review of qualitative studies.**

Sewunet Admasu Belachew1, 2*, Lisa Hall1, Daniel Asfaw Erku3**,** Linda A Selvey1

1School of Public Health, The University of Queensland, 288 Herston Rd, Herston, Qld 4006, Australia

2School of Pharmacy, Faculty of Medicine and Health Sciences, University of Gondar, Ethiopia

3Centre for Applied Health Economics, School of Medicine & Menzies Health Institute Queensland, Griffith University, Queensland, Australia.

***Corresponding author**

Sewunet Admasu Belachew

School of Public Health, The University of Queensland, 288 Herston Rd, Herston, Qld 4006, Australia

Email: [s.admasubelachew@uq.edu.au](mailto:s.admasubelachew@uq.edu.au)

**Authors’ email address**

Linda A Selvey: [l.selvey@uq.edu.au](mailto:l.selvey@uq.edu.au)

Lisa Hall: [l.hall3@uq.edu.au](mailto:l.hall3@uq.edu.au)

Daniel Asfaw Erku: [d.erku@griffith.edu.au](mailto:d.erku@griffith.edu.au%20)

**JBI Critical Appraisal Checklist for Qualitative studies**

| **S.N** | | **Criteria** | **S1** | **S2** | **S3** | **S4** | **S5** | **S6** | **S7** | **S8** | **S9** | **S10** | **S11** | **S12** |
| --- | --- | --- | --- | --- | --- | --- | --- | --- | --- | --- | --- | --- | --- | --- |
| 1 | Is there congruity between the stated philosophical perspective and the research methodology? | | N | N | Y | Y | Y | Y | Y | Y | NA | Y | Y | Y |
| 2 | Is there congruity between the research methodology and the research question or objectives? | | Y | Y | Y | Y | Y | Y | Y | Y | Y | Y | Y | Y |
| 3 | Is there congruity between the research methodology and the methods used to collect data? | | Y | Y | Y | Y | Y | Y | Y | Y | Y | Y | Y | Y |
| 4 | Is there congruity between the research methodology and the representation and analysis of data? | | Y | Y | Y | Y | Y | Y | Y | Y | N | Y | Y | Y |
| 5 | Is there congruity between the research methodology and the interpretation of the result | | Y | Y | Y | Y | Y | Y | Y | Y | Y | Y | Y | Y |
| 6 | Is there a statement locating the researcher culturally or theoretically? | | N | N | N | N | N | N | N | N | N | N | N | N |
| 7 | Is the influence of the researcher on the research, and vice- versa, addressed? | | N | N | N | N | N | N | N | N | N | N | N | N |
| 8 | Are participants, and their voices, adequately represented? | | Y | Y | Y | Y | Y | Y | Y | N | Y | N | Y | Y |
| 9 | Is the research ethical according to current criteria or, for recent studies, and is there evidence of ethical approval by an appropriate body? | | Y | Y | Y | Y | Y | Y | Y | Y | Y | N | Y | Y |
| 10 | Do the conclusions drawn in the research report flow from the analysis, or interpretation, of the data? | | Y | Y | Y | Y | Y | Y | Y | Y | Y | Y | Y | Y |
|  | Total score (max 10) | | 7 | 7 | 8 | 8 | 8 | 8 | 8 | 7 | 6 | 6 | 8 | 8 |

**N:** no **Y:** yes **NA:** Not applicable **U:** unclear

**Studies (S):**

**S 1**: Non-prescribed sale of antibiotics for acute childhood diarrhoea and upper respiratory tract infection in community pharmacies: a 2 phase mixed-methods study

**S 2:** Exploration of over the counter sales of antibiotics in community pharmacies of Addis Ababa, Ethiopia: pharmacy professionals’ perspective

**S 3:** Exploring the reasons why pharmacists dispense antibiotics without prescriptions in Khartoum state, Sudan

**S 4**: What motivates antibiotic dispensing in accredited drug dispensing outlets in Tanzania? A qualitative study

**S 5**: A qualitative analysis of pharmacists’ attitudes and practices regarding the sale of antibiotics without prescription in Syria

**S 6**: Factors associated with inappropriate dispensing of antibiotics among non-pharmacist pharmacy workers

**S 7.** What drives inappropriate antibiotic dispensing? A mixed-methods study of pharmacy employee perspectives in Haryana, India

**S 8**. Antibiotic sales in rural and urban pharmacies in northern Vietnam: an observational study

**S 9**: Irrational use of antibiotics and role of the pharmacist: an insight from a qualitative study in New Delhi, India

**S 10**: Sale of Antibiotics without Prescriptions in Alexandria, Egypt

**S 11**: Antimicrobial dispensing practices and determinants of antimicrobial resistance: a qualitative study among community pharmacists in Pakistan

**S 12**: Determinants of non-prescription antibiotic dispensing in Chinese community pharmacies from socio-ecological and health system perspectives
